# Supplementary figures and images for: A diet with lactosucrose supplementation ameliorates trinitrobenzene sulfonic acid-induced colitis in rats
Source: Royal Society of Chemistry journal article supplement (doi:10.1039/c4fo00381k), 2014-10-15

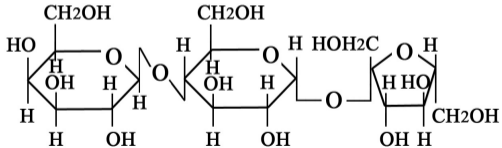

Supplement: c4fo00381k1.pdf [file c4fo00381k1.pdf]
